# Supplementary material
Source: PubMed Central journal article supplement (PMC4918902)
Supplement: NIHMS794452-supplement-supplement_1.pdf [file NIHMS794452-supplement-supplement_1.pdf]

## Host Response to Microgel Coatings on Neural Electrodes Implanted in the Brain

1  
2  
3 curves (c) were generated in a similar manner to those for GFAP and indicate changes  
4  
5 in parameter values over time for the experimental groups. Symbols indicate: \*  
6  
7 significant differences between the groups at one time point, ‡ significant differences  
8  
9 over time between the indicated and preceding time-point for uncoated samples, #  
10  
11 significant differences over time between the indicated and preceding time-point for  
12  
13 microgel-coated samples.  
14  
15  
16  
17

18  
19 **Figure 7:** Immunohistochemistry images (a) from each time point and experimental  
20  
21 group stained with NeuN, a marker for neuronal. Graphs for each time point (b) indicate  
22  
23 the average number of neuronal nuclei in each 100µm bin for uncoated and microgel-  
24  
25 coated samples as a percentage of the cells found in the contralateral uninjured control.  
26  
27 Symbols indicate: \* significant differences between uncoated and microgel-coated  
28  
29 samples, ‡ significant differences between uncoated and contralateral samples, #  
30  
31 significant differences between microgel-coated and contralateral samples, ^ significant  
32  
33 differences between the indicated and preceding time-point for microgel-coated  
34  
35 samples.  
36  
37  
38  
39

40  
41 **Figure S1:** Representative images of the *in vitro* assay showing cell adhesion on the  
42  
43 uncoated (left) and microgel-coated (right) electrodes and underlying coverslips,  
44  
45 indicating continuity of cell density and cell spreading on the coverslip beneath each  
46  
47 electrode.  
48

49  
50 **Figure S2:** Intensity curves for each time point showing the staining intensity for each  
51  
52 individual sample using GFAP (top row), OX42 (middle row), and ED1 (bottom row) at 1  
53  
54 week (left column), 4 weeks (middle column), and 24 weeks (right column).  
55  
56  
57  
58  
59  
60

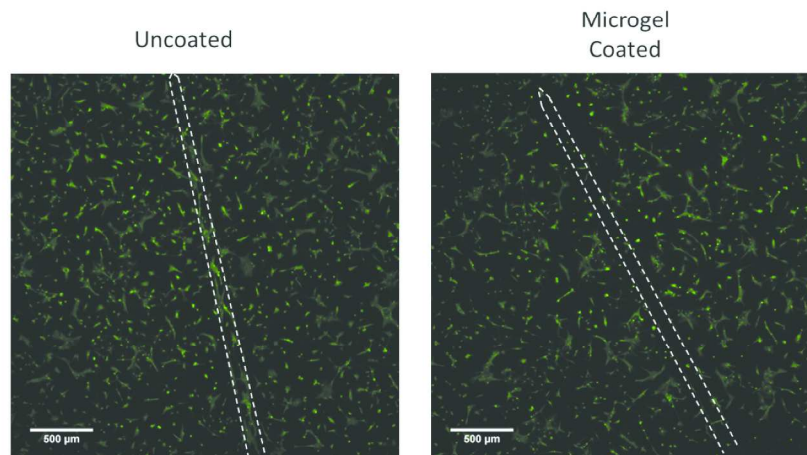

46  
47  
48  
49  
50  
51  
52  
53  
54  
55  
56  
57  
58  
59  
60

Representative images of the in vitro assay showing cell adhesion on the uncoated (left) and microgel-coated (right) electrodes and underlying coverslips, indicating continuity of cell density and cell spreading on the coverslip beneath each electrode.  
279x361mm (300 x 300 DPI)

1  
2  
3  
4  
5  
6  
7  
8  
9  
10  
11  
12  
13  
14  
15  
16  
17  
18  
19  
20  
21  
22  
23  
24  
25  
26  
27  
28  
29  
30  
31  
32  
33  
34  
35  
36  
37  
38  
39  
40  
41  
42  
43  
44  
45  
46  
47  
48  
49  
50  
51  
52  
53  
54  
55  
56  
57  
58  
59  
60

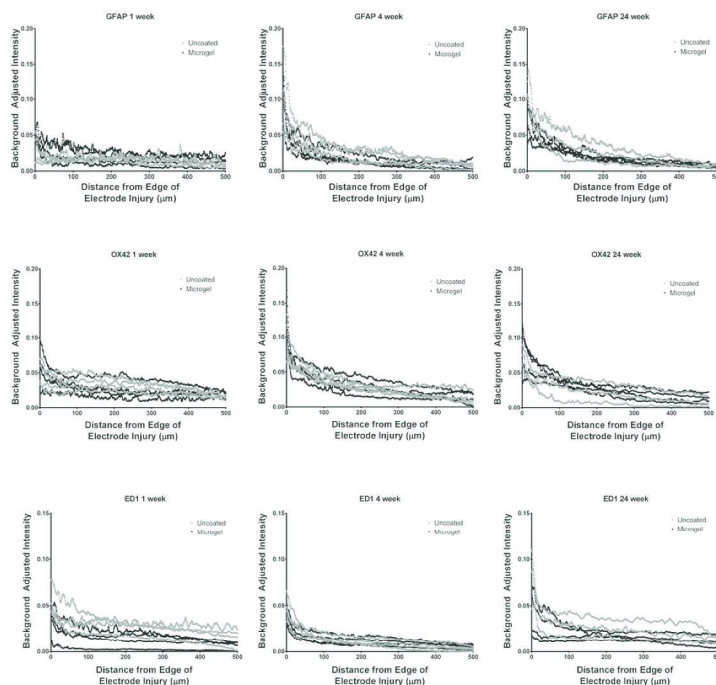

Intensity curves for each time point showing the staining intensity for each individual sample using GFAP (top row), OX42 (middle row), and ED1 (bottom row) at 1 week (left column), 4 weeks (middle column), and 24 weeks (right column).  
279x361mm (300 x 300 DPI)
